# Supplementary material for: Seasonal Variation of Midgut Bacterial Diversity in Culex quinquefasciatus Populations in Haikou City, Hainan Province, China
Source: MDPI journal article supplement (doi:10.3390/biology11081166), 2022-08-03
Supplement: s1 [file s1]

Supplementary Information

Seasonal Variation of Midgut Bacterial Diversity  
in *Culex quinquefasciatus* Populations in Haikou  
City, Hainan Province, China

Penghui Suo, Kaixuan Wang, Hongxiao Yu, Xiuhao Fu, Liping An, Biswajit Bhowmick,  
Jiachao Zhang and Qian Han

Table S1 Sampling location and seasonal mean temperature

|                      | Autumn | Winter | Spring | Summer |
|----------------------|--------|--------|--------|--------|
| 110.34125,20.059658  | 25.9°C | 19.7°C | 26.3°C | 29.3°C |
| 110.349765,20.066619 | 25.9°C | 19.8°C | 26.4°C | 29.4°C |
| 110.335321,20.062502 | 25.9°C | 19.7°C | 26.2°C | 29.3°C |

Table S2 Monitoring number of mosquito species

| Date         | Number |
|--------------|--------|
| 2021. 09. 10 | 561    |
| 2021. 09. 21 | 445    |
| 2021. 09. 30 | 416    |
| 2021. 10. 09 | 420    |
| 2021. 10. 20 | 352    |
| 2021. 10. 31 | 637    |
| 2021. 11. 10 | 620    |
| 2021. 11. 21 | 562    |
| 2021. 11. 30 | 771    |
| 2021. 12. 11 | 181    |
| 2021. 12. 22 | 198    |
| 2021. 12. 30 | 217    |
| 2022. 01. 09 | 290    |
| 2022. 01. 19 | 202    |
| 2022. 01. 31 | 248    |
| 2022. 02. 09 | 229    |
| 2022. 02. 18 | 238    |
| 2022. 02. 28 | 234    |
| 2022. 03. 10 | 229    |
| 2022. 03. 21 | 340    |
| 2022. 03. 30 | 328    |
| 2022. 04. 09 | 305    |
| 2022. 04. 20 | 366    |
| 2022. 04. 29 | 343    |
| 2022. 05. 10 | 458    |
| 2022. 05. 21 | 538    |
| 2022. 05. 30 | 636    |
| 2022. 06. 11 | 542    |
| 2022. 06. 22 | 571    |
| 2022. 06. 30 | 469    |
| 2022. 07. 10 | 682    |
| 2022. 07. 21 | 775    |
| 2022. 07. 31 | 810    |
| 2022. 08. 11 | 749    |
| 2022. 08. 21 | 654    |
| 2022. 08. 31 | 879    |

**Table S3.** Sequencing data and quality statistics.

| Samples | Raw Tags | Clean Tags | Effective Tags | Effective Ratio ( % ) | Max length | Min length | N50 |
|---------|----------|------------|----------------|-----------------------|------------|------------|-----|
| Aut-1   | 129182   | 128746     | 108276         | 82.38                 | 473        | 202        | 461 |
| Aut-2   | 133156   | 132594     | 111281         | 82.03                 | 474        | 204        | 461 |
| Aut-3   | 134496   | 133959     | 112240         | 82.01                 | 474        | 213        | 461 |
| Aut-4   | 125747   | 125323     | 105067         | 82.18                 | 473        | 217        | 461 |
| Aut-5   | 118953   | 118496     | 100299         | 82.9                  | 472        | 205        | 461 |
| Aut-6   | 133674   | 133154     | 114563         | 84.2                  | 473        | 206        | 461 |
| Aut-7   | 128140   | 127585     | 110155         | 84.35                 | 473        | 202        | 461 |
| Aut-8   | 121308   | 120772     | 104115         | 84.24                 | 474        | 206        | 461 |
| Aut-9   | 125103   | 124509     | 109014         | 85.63                 | 473        | 206        | 461 |
| Aut-10  | 131252   | 130742     | 111836         | 83.71                 | 474        | 213        | 461 |
| Aut-11  | 124324   | 123787     | 105423         | 83.16                 | 472        | 210        | 461 |
| Aut-12  | 128169   | 127640     | 107934         | 82.63                 | 471        | 223        | 461 |
| Win-1   | 125976   | 125324     | 113108         | 87.87                 | 470        | 210        | 461 |
| Win-2   | 117857   | 117204     | 104744         | 87.11                 | 472        | 201        | 461 |
| Win-3   | 130472   | 129806     | 119174         | 89.46                 | 474        | 206        | 461 |
| Win-4   | 121588   | 121101     | 107545         | 86.74                 | 471        | 206        | 462 |
| Win-5   | 128890   | 128242     | 111970         | 85.05                 | 472        | 225        | 462 |
| Win-6   | 121981   | 121425     | 108225         | 87.05                 | 474        | 213        | 461 |
| Win-7   | 119529   | 118912     | 107074         | 87.81                 | 473        | 205        | 461 |
| Win-8   | 126144   | 125503     | 111553         | 86.69                 | 472        | 205        | 461 |
| Win-9   | 132015   | 131420     | 116710         | 86.67                 | 474        | 201        | 461 |
| Win-10  | 123375   | 122705     | 108787         | 86.41                 | 470        | 218        | 461 |
| Win-11  | 130669   | 130029     | 118209         | 88.65                 | 470        | 213        | 461 |
| Win-12  | 125223   | 124694     | 110570         | 86.53                 | 472        | 204        | 462 |
| Win-13  | 133448   | 132783     | 118939         | 87.18                 | 474        | 214        | 461 |
| Win-14  | 127533   | 126991     | 110656         | 84.93                 | 472        | 214        | 462 |
| Win-15  | 128653   | 128170     | 114714         | 87.59                 | 473        | 223        | 463 |
| Spr-1   | 132533   | 132089     | 119783         | 88.83                 | 473        | 205        | 466 |
| Spr-2   | 127994   | 127527     | 117902         | 90.52                 | 474        | 218        | 466 |
| Spr-3   | 120432   | 119945     | 108410         | 88.41                 | 473        | 218        | 466 |
| Spr-4   | 132403   | 132034     | 123256         | 91.59                 | 473        | 210        | 466 |
| Spr-5   | 117903   | 117579     | 112113         | 93.4                  | 470        | 224        | 466 |
| Spr-6   | 131465   | 131162     | 121718         | 91.29                 | 473        | 225        | 466 |
| Spr-7   | 118341   | 118002     | 109574         | 91.11                 | 473        | 210        | 466 |
| Spr-8   | 130625   | 130173     | 119734         | 90.19                 | 474        | 218        | 466 |
| Spr-9   | 119462   | 119108     | 109973         | 90.65                 | 473        | 220        | 466 |
| Spr-10  | 121017   | 120614     | 110974         | 90.1                  | 474        | 205        | 466 |
| Spr-11  | 132778   | 132386     | 122463         | 90.62                 | 473        | 210        | 466 |

|        |        |        |        |       |     |     |     |
|--------|--------|--------|--------|-------|-----|-----|-----|
| Spr-12 | 124319 | 123943 | 110875 | 87.65 | 470 | 218 | 466 |
| Spr-13 | 133638 | 133217 | 122187 | 89.9  | 474 | 230 | 466 |
| Spr-14 | 135710 | 135203 | 122339 | 88.69 | 473 | 202 | 466 |
| Spr-15 | 130647 | 130128 | 121559 | 91.42 | 470 | 218 | 466 |
| Sum-1  | 134059 | 133637 | 128788 | 94.57 | 472 | 209 | 466 |
| Sum-2  | 125635 | 125049 | 111233 | 86.96 | 474 | 205 | 466 |
| Sum-3  | 131790 | 131318 | 120908 | 90.26 | 474 | 206 | 466 |
| Sum-4  | 133932 | 133284 | 121428 | 89.08 | 474 | 208 | 466 |
| Sum-5  | 118314 | 117820 | 112657 | 93.58 | 473 | 219 | 466 |
| Sum-6  | 122328 | 121774 | 107087 | 86.06 | 473 | 205 | 466 |
| Sum-7  | 122665 | 122313 | 118076 | 94.63 | 473 | 209 | 466 |
| Sum-8  | 127303 | 126719 | 116525 | 89.98 | 469 | 218 | 466 |
| Sum-9  | 129747 | 129198 | 118142 | 89.52 | 473 | 210 | 466 |
| Sum-10 | 128803 | 128164 | 116510 | 88.98 | 474 | 202 | 466 |
